# Supplementary material
Source: HighWire-hosted journal article supplement (https://openheart.bmj.com/content/9/2/e001876)
Supplement: inline-supplementary-material-1 [file inline-supplementary-material-1.pdf]

**Supplementary Table 1: Clinical outcomes in-hospital and at 30 days**

|                      | No NRI      | NRI        | NDR        | P value |
|----------------------|-------------|------------|------------|---------|
| In hospital outcomes |             |            |            |         |
| Mortality            | 437 (1.2)   | 189 (16.7) | 102 (45.3) | < 0.001 |
| MI                   | 295 (0.8)   | 41 (3.6)   | 12 (5.3)   | < 0.001 |
| PCI                  | 1273 (3.6)  | 61 (5.4)   | 14 (6.2)   | 0.001   |
| TVR                  | 262 (0.7)   | 17 (1.5)   | 4 (1.8)    | 0.003   |
| TLR                  | 206 (0.6)   | 13 (1.2)   | 3 (1.3)    | 0.019   |
| CABG                 | 291 (0.8)   | 42 (3.7)   | 20 (8.9)   | < 0.001 |
| ST                   | 106 (0.3)   | 14 (1.2)   | 11 (4.9)   | < 0.001 |
| Major bleed          | 283 (0.8)   | 67 (5.9)   | 50 (22.2)  | < 0.001 |
| Stroke               | 97 (0.3)    | 20 (1.8)   | 8 (3.6)    | < 0.001 |
| 30-day outcomes      |             |            |            |         |
| Mortality            | 586 (1.7)   | 216 (19.1) | 110 (48.9) | < 0.001 |
| MI                   | 471 (1.3)   | 53 (4.7)   | 12 (5.3)   | < 0.001 |
| ST                   | 195 (0.6)   | 19 (1.7)   | 11 (4.9)   | < 0.001 |
| Major bleed          | 421 (1.2)   | 77 (6.8)   | 51 (22.7)  | < 0.001 |
| Rehospitalisation    | 4415 (12.6) | 184 (19.5) | 31 (25.2)  | < 0.001 |
| TVR 30 days          | 519 (1.5)   | 24 (2.1)   | 5 (2.2)    | 0.128   |

|              |           |          |          |         |
|--------------|-----------|----------|----------|---------|
| TLR 30 days  | 374 (1.1) | 17 (1.5) | 4 (1.8)  | 0.205   |
| CABG 30 days | 414 (1.2) | 44 (3.9) | 21 (9.3) | < 0.001 |

CABG, coronary artery bypass graft; MI, myocardial infarction; PCI, percutaneous coronary intervention; ST, stent thrombosis; TVR, target vessel revascularisation; TLR, target lesion revascularisation; NDR, new dialysis requirement; NRI, new renal impairment.

Values are expressed as n (%).

**Supplementary Table 2: Multivariate analysis for clinical outcome of 30-day mortality**

|                                                   | OR   | CI          | P value |
|---------------------------------------------------|------|-------------|---------|
| Combined NRI or NDR                               | 4.77 | 3.89 – 5.86 | < 0.001 |
| Age                                               | 1.04 | 1.03 – 1.05 | < 0.001 |
| Female sex                                        | 1.20 | 0.99 – 1.46 | 0.063   |
| Diabetes mellitus                                 | 1.12 | 0.92 – 1.37 | 0.255   |
| Peripheral vascular disease                       | 1.34 | 0.96 – 1.87 | 0.086   |
| Cerebrovascular disease                           | 1.24 | 0.89 – 1.73 | 0.207   |
| Previous PCI                                      | 0.99 | 0.80 – 1.22 | 0.907   |
| Renal Function (eGFR; mL/min/1.73m <sup>2</sup> ) |      |             |         |
| Stage I-II (>60)                                  | 1.29 | 0.91 – 1.82 | 0.150   |
| Stage IIIa (45-59)                                | 1.97 | 1.35 – 2.88 | < 0.001 |
| Stage IIIb (30-44)                                | 2.70 | 1.82 – 4.00 | < 0.001 |
| Stage IV-V (<30)                                  | 3.31 | 2.15 – 5.10 | < 0.001 |
| LVEF                                              |      |             |         |
| Mild (45-49%)                                     | 1.63 | 1.25 – 2.12 | < 0.001 |
| Moderate (35-44%)                                 | 3.33 | 2.61 – 4.23 | < 0.001 |
| Severe (<35%)                                     | 6.25 | 4.90 – 7.97 | < 0.001 |
| Urgent PCI                                        | 2.04 | 1.56 – 2.67 | < 0.001 |

|                            |      |             |         |                      |
|----------------------------|------|-------------|---------|----------------------|
| Cardiogenic shock          | 5.93 | 4.73 – 7.42 | < 0.001 |                      |
| OHCA                       | 5.99 | 4.69 – 7.65 | < 0.001 |                      |
| IHCA                       | 2.08 | 1.57 – 2.76 | < 0.001 |                      |
| Thienopyridine             | 0.80 | 0.63 – 1.02 | 0.073   |                      |
| Aspirin                    | 0.79 | 0.59 – 1.04 | 0.093   | NRI,<br>new<br>renal |
| Ticagrelor                 | 0.94 | 0.75 – 1.16 | 0.548   |                      |
| Femoral access             | 1.38 | 1.15 – 1.65 | < 0.001 |                      |
| Adjunctive device required | 1.01 | 0.78 – 1.29 | 0.965   |                      |
| Lesion B2/C                | 1.68 | 1.38 – 2.04 | < 0.001 |                      |

impairment; NDR, new dialysis requirement; CI, confidence interval; CKD, chronic kidney disease; eGFR, estimated glomerular filtration rate; IHCA, in hospital cardiac arrest; LVEF, left ventricular ejection fraction; OHCA, out of hospital cardiac arrest; OR, odds ratio; PCI, percutaneous coronary intervention.

Adjusted for age, sex, private hospital, diabetes mellitus, peripheral vascular disease, cerebrovascular disease, CKD, previous PCI, LVEF, renal function, urgent PCI, cardiogenic shock, OHCA, IHCA, preprocedural medications (including thienopyridine, aspirin, ticagrelor), femoral access, requirement for adjunctive device, lesion type (i.e. B2/C).

**Supplementary Table 3: Multivariate analysis for clinical outcome of 30-day major adverse cardiac event (MACE)**

|                                                   | OR   | CI          | P value |
|---------------------------------------------------|------|-------------|---------|
| Combined NRI or NDR                               | 3.72 | 3.15 – 4.39 | < 0.001 |
| Age                                               | 1.01 | 1.01 - 1.02 | < 0.001 |
| Female sex                                        | 1.24 | 1.10 – 1.41 | 0.001   |
| Diabetes mellitus                                 | 1.10 | 0.97 – 1.26 | 0.138   |
| Peripheral vascular disease                       | 1.30 | 1.02 – 1.65 | 0.035   |
| Cerebrovascular disease                           | 1.21 | 0.96 – 1.54 | 0.109   |
| Previous PCI                                      | 1.24 | 1.09 – 1.41 | 0.001   |
| Renal Function (eGFR; mL/min/1.73m <sup>2</sup> ) |      |             |         |
| Stage I-II (>60)                                  | 1.28 | 1.02 – 1.60 | 0.031   |
| Stage IIIa (45-59)                                | 1.32 | 1.02 – 1.72 | 0.037   |
| Stage IIIb (30-44)                                | 1.60 | 1.21 – 2.11 | < 0.001 |
| Stage IV-V (<30)                                  | 1.77 | 1.26 – 2.44 | < 0.001 |
| LVEF                                              |      |             |         |
| Mild (45-49%)                                     | 1.06 | 0.91 – 1.24 | 0.467   |
| Moderate (35-44%)                                 | 1.74 | 1.49 – 2.03 | < 0.001 |
| Severe (<35%)                                     | 2.93 | 2.47 – 3.47 | < 0.001 |

|                            |      |             |         |
|----------------------------|------|-------------|---------|
| Urgent PCI                 | 1.76 | 1.52 – 2.05 | < 0.001 |
| Cardiogenic shock          | 4.02 | 3.33 – 4.85 | < 0.001 |
| OHCA                       | 3.00 | 2.46 – 3.67 | < 0.001 |
| IHCA                       | 1.89 | 1.49 – 2.40 | < 0.001 |
| Thienopyridine             | 0.74 | 0.64 – 0.87 | < 0.001 |
| Aspirin                    | 0.93 | 0.77 – 1.13 | 0.456   |
| Ticagrelor                 | 0.84 | 0.73 – 0.97 | 0.017   |
| Femoral access             | 1.09 | 0.97 – 1.23 | 0.139   |
| Adjunctive device required | 1.09 | 0.93 – 1.29 | 0.289   |
| Lesion B2/C                | 1.52 | 1.35 – 1.73 | < 0.001 |

NRI, new renal impairment; NDR, new dialysis requirement; CI, confidence interval; CKD, chronic kidney disease; eGFR, estimated glomerular filtration rate; IHCA, in hospital cardiac arrest; LVEF, left ventricular ejection fraction; OHCA, out of hospital cardiac arrest; OR, odds ratio; PCI, percutaneous coronary intervention.

Adjusted for age, sex, private hospital, diabetes mellitus, peripheral vascular disease, cerebrovascular disease, CKD, previous PCI, LVEF, renal function, urgent PCI, cardiogenic shock, OHCA, IHCA, preprocedural medications (including thienopyridine, aspirin, ticagrelor), femoral access, requirement for adjunctive device, lesion type (i.e. B2/C).

**Supplementary Table 4: Cox Proportional-Hazards Multivariate Analysis for long-term mortality**

|                                                   | HR   | CI          | P value |
|---------------------------------------------------|------|-------------|---------|
| Combined NRI or NDR                               | 2.18 | 1.94 – 2.46 | < 0.001 |
| Age                                               | 1.05 | 1.04 – 1.05 | < 0.001 |
| Female sex                                        | 0.97 | 0.88 – 1.06 | 0.046   |
| Diabetes mellitus                                 | 1.34 | 1.23 – 1.46 | < 0.001 |
| Peripheral vascular disease                       | 1.35 | 1.17 – 1.56 | < 0.001 |
| Cerebrovascular disease                           | 1.30 | 1.12 – 1.49 | < 0.001 |
| Previous PCI                                      | 1.11 | 1.01 – 1.22 | 0.029   |
| Renal Function (eGFR; mL/min/1.73m <sup>2</sup> ) |      |             |         |
| Stage I-II (>60)                                  | 1.05 | 0.88 – 1.26 | 0.568   |
| Stage IIIa (45-59)                                | 1.57 | 1.29 – 1.92 | < 0.001 |
| Stage IIIb (30-44)                                | 2.11 | 1.72 – 2.59 | < 0.001 |
| Stage IV-V (<30)                                  | 3.73 | 3.01 – 4.62 | < 0.001 |
| LVEF                                              |      |             |         |
| Mild (45-49%)                                     | 1.24 | 1.11 – 1.39 | < 0.001 |
| Moderate (35-44%)                                 | 1.96 | 1.75 – 2.20 | < 0.001 |
| Severe (<35%)                                     | 2.99 | 2.65 – 3.37 | < 0.001 |
| Urgent PCI                                        | 1.14 | 1.03 – 1.26 | 0.012   |

|                            |      |             |         |
|----------------------------|------|-------------|---------|
| Cardiogenic shock          | 3.18 | 2.76 – 3.65 | < 0.001 |
| OHCA                       | 2.40 | 2.07 – 2.79 | < 0.001 |
| IHCA                       | 1.35 | 1.14 – 1.60 | 0.001   |
| Thienopyridine             | 0.94 | 0.84 – 1.04 | 0.223   |
| Aspirin                    | 0.99 | 0.87 – 1.12 | 0.881   |
| Ticagrelor                 | 0.89 | 0.80 – 0.99 | 0.029   |
| Femoral access             | 1.15 | 1.06 – 1.25 | 0.001   |
| Adjunctive device required | 1.09 | 0.97 – 1.23 | 0.159   |
| Lesion B2/C                | 1.31 | 1.20 – 1.43 | < 0.001 |

VCOR data correlated with 5-year mortality data sourced from the National Death Index (NDI) database

NRI, new renal impairment; NDR, new dialysis requirement; CI, confidence interval; CKD, chronic kidney disease; eGFR, estimated glomerular filtration rate; IHCA, in hospital cardiac arrest; LVEF, left ventricular ejection fraction; OHCA, out of hospital cardiac arrest; HR, hazard ratio; PCI, percutaneous coronary intervention.

Adjusted for age, sex, private hospital, diabetes mellitus, CKD, peripheral vascular disease, cerebrovascular disease, previous PCI, LVEF, renal function, urgent PCI, cardiogenic shock, OHCA, IHCA, preprocedural medications (including thienopyridine, aspirin, ticagrelor), femoral access, requirement for adjunctive device, lesion type (i.e. B2/C).



**Supplementary Figure 1: Selection of study cohort flow chart**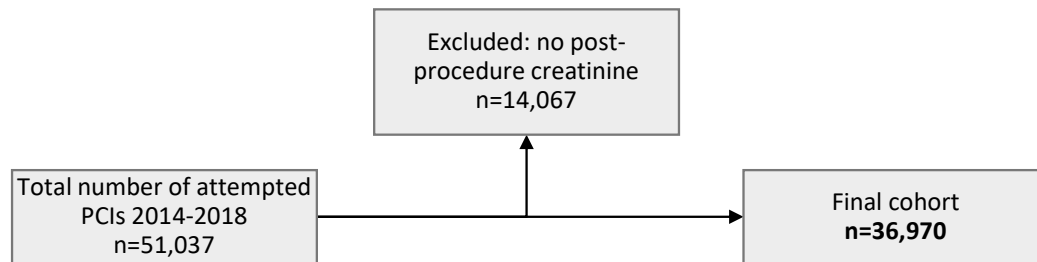

PCI, percutaneous coronary intervention

**Supplementary Figure 2: Independent predictors of major adverse cardiac event (MACE)**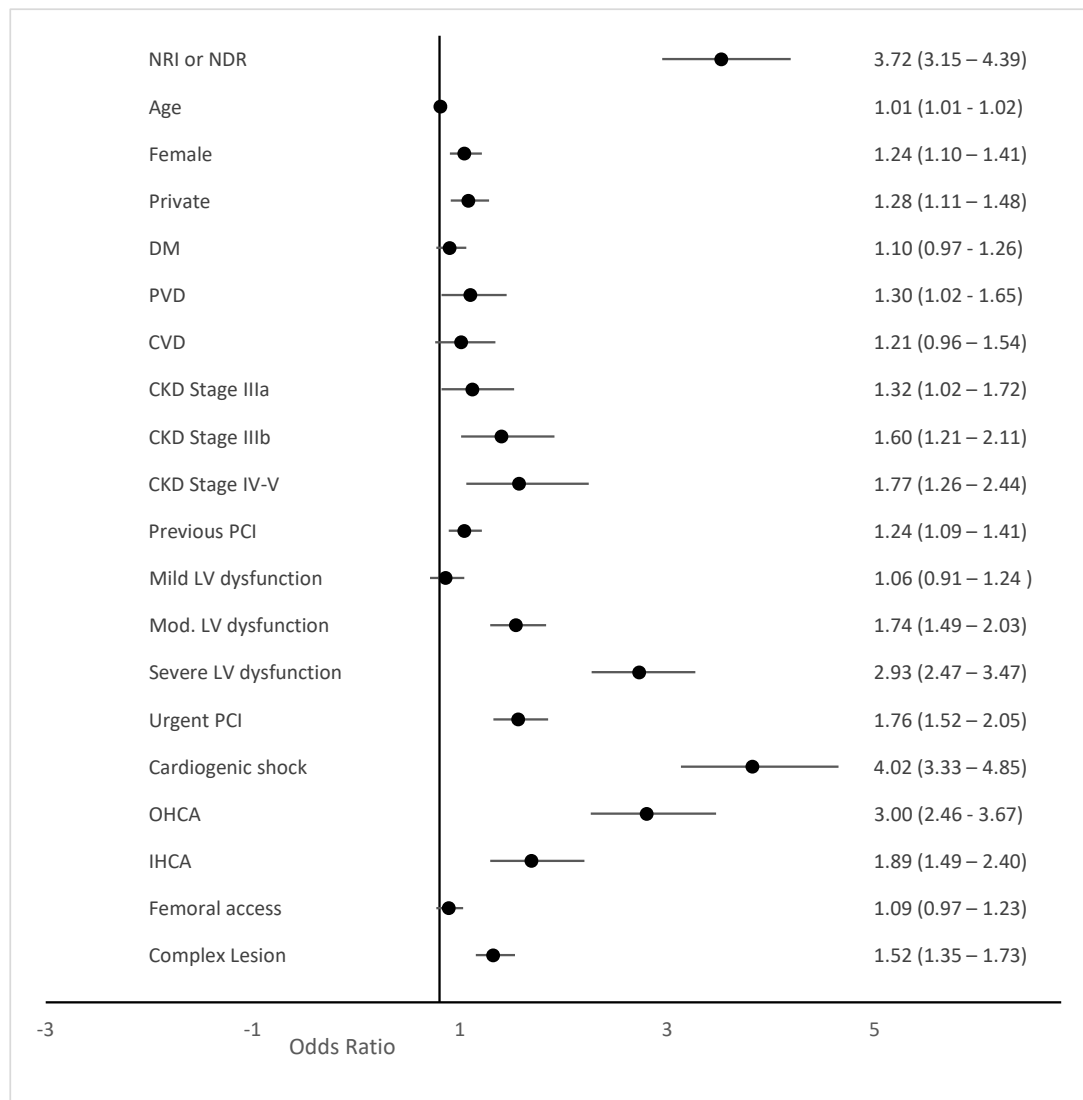

NRI, new renal impairment; NDR, new dialysis requirement; DM, diabetes mellitus; PVD, peripheral vascular disease; CVD, cerebrovascular disease; CKD, chronic kidney disease; IHCA, in hospital cardiac arrest; LV, left ventricular; OHCA, out of hospital cardiac arrest; PCI, percutaneous coronary intervention.

Supplementary Figure 3: Kaplan-Meier curve for 5-year mortality of combined NRI/NDR

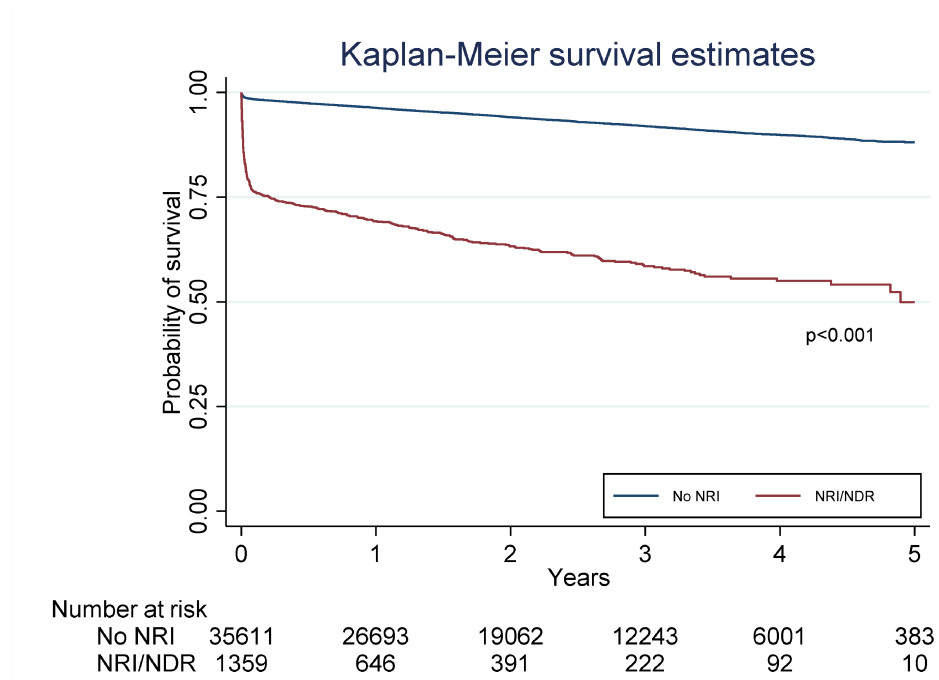

NRI, new renal impairment; NDR, new dialysis requirement
